# Supplementary material for: Frequency and Characteristics of Infections Caused by Extended-Spectrum Beta-Lactamase-Producing Organisms in Neonates: A Prospective Cohort Study
Source: Hindawi journal article supplement (doi:10.1155/2013/756209), 2013-01-01
Supplement: f1 [file 756209.f1.pdf]

## Supplementary material

**Table-1 : Risk factors for early onset sepsis**

- 
- Rupture of membranes (>24 hours)
  - Foul smelling and / or meconium stained liquor amnii
  - Febrile illness in the mother with the evidence of bacterial infection ,within two weeks prior to delivery
  - Single unclean or >3 sterile vaginal examinations during labor
  - Clinical features of chorioamnionitis such as fever, abdominal pain, tachycardia, leucocytosis, uterine tenderness, foul smelling liquor.
  - Low birth weight (<2500 grams) or prematurity
  - Perinatal asphyxia ( Apgar score <4 at 1 minute of age)
-

**Table-2.1: Clinical features suggestive of sepsis**

---

**Non-specific features**

- Hypothermia or fever;
  - Lethargy, poor cry, refusal to feed;
  - Poor perfusion, prolonged capillary refill time;
  - Hypotonia, absent neonatal reflexes;
  - Bradycardia/Tachycardia;
  - Respiratory distress, apnea, gasping respiration;
  - Hypoglycemia/hyperglycemia
  - Metabolic acidosis
- 

**Table-2.2 :Specific features**

|                                                                                                                                                                                              |                                                                                                                                                      |
|----------------------------------------------------------------------------------------------------------------------------------------------------------------------------------------------|------------------------------------------------------------------------------------------------------------------------------------------------------|
| <ul style="list-style-type: none"><li>• Bulging anterior fontanelle</li><li>• Vacant stare</li><li>• High pitched cry</li><li>• Excessive irritability</li><li>• Altered sensorium</li></ul> | <ul style="list-style-type: none"><li>• Abdominal distension'</li><li>• Vomiting</li><li>• Diarrhea</li><li>• Bleeding</li><li>• Petechiae</li></ul> |
|----------------------------------------------------------------------------------------------------------------------------------------------------------------------------------------------|------------------------------------------------------------------------------------------------------------------------------------------------------|

|                                                                                                                                                                             |                                                                                                                                                                                                                       |
|-----------------------------------------------------------------------------------------------------------------------------------------------------------------------------|-----------------------------------------------------------------------------------------------------------------------------------------------------------------------------------------------------------------------|
| <ul style="list-style-type: none"> <li>• Seizures</li> <li>• Neck retraction</li> <li>• Hypotension</li> <li>• Shock</li> <li>• Jaundice with high colored urine</li> </ul> | <ul style="list-style-type: none"> <li>• Sclerema</li> <li>• Multiple pustules /abscess/mottling</li> <li>• Non passage of urine &gt;12 hours</li> <li>• Umbilical sepsis in the form of redness/discharge</li> </ul> |
|-----------------------------------------------------------------------------------------------------------------------------------------------------------------------------|-----------------------------------------------------------------------------------------------------------------------------------------------------------------------------------------------------------------------|

Presence of any one of the above features was considered suggestive of sepsis

**Table-3: Sepsis Screen**

| Parameters                      | Abnormal value                 |
|---------------------------------|--------------------------------|
| Total Leucocyte count           | 5000/cu.mm                     |
| Absolute neutrophil count       | Low counts as per Monroe chart |
| Immature/Total neutrophil ratio | >0.2                           |
| Micro ESR                       | Age in days + 3                |
| C-Reactive Protein              | Positive (>1mg/dl)             |

Positive sepsis screen included at least two abnormal parameters.
